# Supplementary material
Source: PubMed Central journal article supplement (PMC3906806)
Supplement: ismej2013137x1.pdf [file ismej2013137x1.pdf]

## Supplementary Figures and Tables

### Potential role of viruses in white plague coral disease

Nitzan Soffer, Marilyn E. Brandt, Adrienne M.S. Correa, Tyler B. Smith,  
and Rebecca Vega Thurber

Supplemental Table 1. Number of sequence reads before and after quality processing and contamination screening.

| Sample                                 | # Raw Reads    | # Reads post-QC | # Reads post-QC +Deconseq | # of Similarities to Viral Database | # of similarities to Euk viruses |
|----------------------------------------|----------------|-----------------|---------------------------|-------------------------------------|----------------------------------|
| <b>Healthy Total</b>                   | <b>68522</b>   | <b>21715</b>    | <b>11601</b>              | <b>4077 (35.14%)</b>                | <b>185</b>                       |
| Healthy1                               | 46634          | 11311           | 1608                      | 429                                 | 83                               |
| Healthy2                               | 21888          | 10404           | 9993                      | 3648                                | 102                              |
| <b>Bleached Total</b>                  | <b>177786</b>  | <b>71535</b>    | <b>57173</b>              | <b>7030 (12.62%)</b>                | <b>2478</b>                      |
| Blch1                                  | 63252          | 24612           | 17786                     | 1907                                | 915                              |
| Blch2                                  | 7035           | 2423            | 2336                      | 206                                 | 115                              |
| Blch3                                  | 24432          | 11337           | 9409                      | 808                                 | 363                              |
| Blch4                                  | 77208          | 30529           | 25037                     | 2743                                | 798                              |
| Blch5                                  | 5859           | 2634            | 2605                      | 1366                                | 287                              |
| <b>Bleached and WP Diseased Total</b>  | <b>201986</b>  | <b>82382</b>    | <b>78536</b>              | <b>18438 (23.45%)</b>               | <b>3601</b>                      |
| Blch+Dis1                              | 19087          | 5892            | 5677                      | 728                                 | 342                              |
| Blch+Dis2                              | 7424           | 3371            | 3033                      | 459                                 | 106                              |
| Blch+Dis3                              | 11079          | 4568            | 4068                      | 447                                 | 304                              |
| Blch+Dis4                              | 62793          | 26118           | 24953                     | 10317                               | 1197                             |
| Blch+Dis5                              | 30660          | 12147           | 11924                     | 1904                                | 392                              |
| Blch+Dis6                              | 28843          | 13848           | 12942                     | 2122                                | 828                              |
| Blch+Dis7                              | 42100          | 16438           | 15939                     | 2461                                | 432                              |
| <b>WP Diseased Total</b>               | <b>494119</b>  | <b>184309</b>   | <b>172690</b>             | <b>41382 (23.96%)</b>               | <b>12065</b>                     |
| Dis1                                   | 153916         | 65278           | 60629                     | 16488                               | 6760                             |
| Dis2                                   | 47745          | 16652           | 14905                     | 1781                                | 1057                             |
| Dis3                                   | 70392          | 26265           | 25484                     | 8776                                | 1919                             |
| Dis4                                   | 58522          | 22674           | 20186                     | 3562                                | 821                              |
| Dis5                                   | 83522          | 28283           | 27065                     | 4190                                | 934                              |
| Dis6                                   | 34474          | 12598           | 12108                     | 2098                                | 285                              |
| Dis7                                   | 45548          | 12559           | 12313                     | 4487                                | 289                              |
| <b>SW Bleached Total</b>               | <b>45290</b>   | <b>18009</b>    | <b>17405</b>              | <b>4028 (23.14%)</b>                | <b>699</b>                       |
| <b>SW Bleached + WP Diseased Total</b> | <b>54645</b>   | <b>22689</b>    | <b>22685</b>              | <b>2965 (13.07%)</b>                | <b>515</b>                       |
| <b>Grand Total</b>                     | <b>1044444</b> | <b>400639</b>   | <b>360788</b>             | <b>77920 (21.60%)</b>               | <b>19543</b>                     |

Supplemental Table 2. Similarity Percentage (SIMPER) analysis describing variation among sample types. Mean similarity (Avg. Sim.) among like sample types, and mean dissimilarity (Avg. Diss.) among different sample types are listed. All values are expressed as mean percentages. Viral types contributing to the dissimilarity are denoted by x or y superscript. Y denotes that the sample type from the table vertical column is contributing, while x denotes sample type from the horizontal row axis is contributing. Some samples have less than 1% difference in their contribution, and are labeled with xy.

| Sample                    | Healthy                                                                                                                                                                                                                                                                                                                      | Bleached                                                                                                                                                                                                                                                                                                                     | Bleached+ WP Diseased                                                                                                                                                                                                                                                                                                                                       | WP Diseased                                                                                                                                                                                                                                                                                                                                                                                  | SW Bleached                                                                                                                                                                                                                                                            | SW Bleched+ WP Diseased  |
|---------------------------|------------------------------------------------------------------------------------------------------------------------------------------------------------------------------------------------------------------------------------------------------------------------------------------------------------------------------|------------------------------------------------------------------------------------------------------------------------------------------------------------------------------------------------------------------------------------------------------------------------------------------------------------------------------|-------------------------------------------------------------------------------------------------------------------------------------------------------------------------------------------------------------------------------------------------------------------------------------------------------------------------------------------------------------|----------------------------------------------------------------------------------------------------------------------------------------------------------------------------------------------------------------------------------------------------------------------------------------------------------------------------------------------------------------------------------------------|------------------------------------------------------------------------------------------------------------------------------------------------------------------------------------------------------------------------------------------------------------------------|--------------------------|
| Healthy                   | <b>Avg. Sim. 70.94</b><br><i>Herpesviridae</i> 81.33<br><i>Phycodnaviridae</i> 10.84                                                                                                                                                                                                                                         |                                                                                                                                                                                                                                                                                                                              |                                                                                                                                                                                                                                                                                                                                                             |                                                                                                                                                                                                                                                                                                                                                                                              |                                                                                                                                                                                                                                                                        |                          |
| Bleached                  | <b>Avg. Diss. 46.12</b><br><i>Herpesviridae</i> 27.66 <sup>x</sup><br><i>Phycodnaviridae</i> 13.69 <sup>xy</sup><br><i>Circoviridae</i> 12.55 <sup>y</sup><br><i>Mimiviridae</i> 10.88 <sup>x</sup><br><i>Nanoviridae</i> 10.43 <sup>y</sup><br><i>Ascoviridae</i> 9.63 <sup>y</sup><br><i>Poxviridae</i> 9.46 <sup>y</sup>  | <b>Avg. Sim. 44.38</b><br><i>Herpesviridae</i> 58.76<br><i>Phycodnaviridae</i> 17.97<br><i>Mimiviridae</i> 7.64<br><i>Ascoviridae</i> 5.44<br><i>Poxviridae</i> 5.37                                                                                                                                                         |                                                                                                                                                                                                                                                                                                                                                             |                                                                                                                                                                                                                                                                                                                                                                                              |                                                                                                                                                                                                                                                                        |                          |
| Bleached + WP Diseased    | <b>Avg Diss. 49.72</b><br><i>Herpesviridae</i> 29.26 <sup>x</sup><br><i>Mimiviridae</i> 14.68 <sup>xy</sup><br><i>Phycodnaviridae</i> 13.60 <sup>xy</sup><br><i>Poxviridae</i> 9.78 <sup>y</sup><br><i>Circoviridae</i> 8.86 <sup>y</sup><br>Satellite 13.12 <sup>y</sup><br><i>Papillomaviridae</i> 3.87 <sup>x</sup>       | <b>Avg. Diss. 54.23</b><br><i>Herpesviridae</i> 15.55 <sup>x</sup><br><i>Phycodnaviridae</i> 13.33 <sup>xy</sup><br><i>Mimiviridae</i> 12.55 <sup>y</sup><br><i>Circoviridae</i> 12.76 <sup>x</sup><br><i>Poxviridae</i> 11.89 <sup>y</sup><br><i>Nanoviridae</i> 8.94 <sup>x</sup><br><i>Ascoviridae</i> 8.34 <sup>x</sup>  | <b>Avg. Sim. 42.44</b><br><i>Herpesviridae</i> 57.55<br><i>Phycodnaviridae</i> 17.95<br><i>Mimiviridae</i> 10.06<br><i>Circoviridae</i> 6.87                                                                                                                                                                                                                |                                                                                                                                                                                                                                                                                                                                                                                              |                                                                                                                                                                                                                                                                        |                          |
| WP Diseased               | <b>Avg. Diss. 71.99</b><br><i>Herpesviridae</i> 31.75 <sup>x</sup><br><i>Circoviridae</i> 21.39 <sup>y</sup><br><i>Nanoviridae</i> 12.21 <sup>y</sup><br>Satellite 9.76 <sup>y</sup><br><i>Phycodnaviridae</i> 8.50 <sup>x</sup><br><i>Mimiviridae</i> 7.91 <sup>x</sup>                                                     | <b>Avg. Diss. 59.84</b><br><i>Circoviridae</i> 19.51 <sup>y</sup><br><i>Herpesviridae</i> 19.22 <sup>x</sup><br><i>Nanoviridae</i> 15.80 <sup>y</sup><br>Satellite 11.74 <sup>y</sup><br><i>Phycodnaviridae</i> 10.49 <sup>x</sup><br><i>Ascoviridae</i> 7.59 <sup>x</sup><br><i>Poxviridae</i> 6.48 <sup>x</sup>            | <b>Avg. Diss. 61.93</b><br><i>Circoviridae</i> 19.51 <sup>y</sup><br>Satellite 15.62 <sup>y</sup><br><i>Herpesviridae</i> 15.58 <sup>x</sup><br><i>Nanoviridae</i> 13.99 <sup>y</sup><br><i>Mimiviridae</i> 10.70 <sup>x</sup><br><i>Phycodnaviridae</i> 10.29 <sup>x</sup><br><i>Poxviridae</i> 7.81 <sup>x</sup>                                          | <b>Avg. Sim. 55.90</b><br><i>Circoviridae</i> 35.94<br><i>Herpesviridae</i> 19.51<br><i>Nanoviridae</i> 16.62<br>Satellite 11.09<br><i>Phycodnaviridae</i> 9.49                                                                                                                                                                                                                              |                                                                                                                                                                                                                                                                        |                          |
| SW Bleached               | <b>Avg. Diss. 75.99</b><br><i>Herpesviridae</i> 40.02 <sup>x</sup><br><i>Circoviridae</i> 20.30 <sup>y</sup><br>Satellite 9.59 <sup>y</sup><br><i>Nanoviridae</i> 6.69 <sup>y</sup><br><i>Phycodnaviridae</i> 6.62 <sup>y</sup><br><i>Mimiviridae</i> 6.55 <sup>x</sup><br><i>Polydnaviridae</i> 4.46 <sup>y</sup>           | <b>Avg. Diss. 66.47</b><br><i>Herpesviridae</i> 26.56 <sup>x</sup><br><i>Circoviridae</i> 17.92 <sup>y</sup><br>Satellite 10.96 <sup>y</sup><br><i>Phycodnaviridae</i> 10.81 <sup>y</sup><br><i>Nanoviridae</i> 10.72 <sup>x</sup><br><i>Ascoviridae</i> 6.72 <sup>x</sup><br><i>Poxviridae</i> 6.41 <sup>x</sup>            | <b>Avg. Diss. 66.36</b><br><i>Herpesviridae</i> 23.91 <sup>x</sup><br><i>Circoviridae</i> 16.61 <sup>y</sup><br>Satellite 14.09 <sup>y</sup><br><i>Phycodnaviridae</i> 12.02 <sup>y</sup><br><i>Mimiviridae</i> 9.93 <sup>x</sup><br><i>Nanoviridae</i> 7.40 <sup>x</sup><br><i>Poxviridae</i> 7.15 <sup>x</sup>                                            | <b>Avg. Diss. 42.62</b><br><i>Phycodnaviridae</i> 20.28 <sup>y</sup><br><i>Herpesviridae</i> 17.73 <sup>x</sup><br><i>Circoviridae</i> 15.06 <sup>x</sup><br><i>Nanoviridae</i> <sup>y</sup><br>Satellite 13.84 <sup>x</sup><br><i>Polydnaviridae</i> 12.82 <sup>x</sup><br><i>Mimiviridae</i> <sup>y</sup><br><i>Poxviridae</i> 6.99 <sup>y</sup><br>3.06 <sup>y</sup><br>2.95 <sup>x</sup> | NA (less than 2 samples)                                                                                                                                                                                                                                               |                          |
| SW Bleached + WP Diseased | <b>Avg. Diss. 76.46</b><br><i>Herpesviridae</i> 40.03 <sup>x</sup><br><i>Nanoviridae</i> 14.13 <sup>y</sup><br><i>Phycodnaviridae</i> 12.03 <sup>y</sup><br><i>Circoviridae</i> 59.07 <sup>y</sup><br><i>Mimiviridae</i> 6.20 <sup>x</sup><br><i>Polydnaviridae</i> 5.06 <sup>y</sup><br><i>Poxviridae</i> 3.59 <sup>y</sup> | <b>Avg. Diss. 63.45</b><br><i>Herpesviridae</i> 28.13 <sup>x</sup><br><i>Nanoviridae</i> 16.64 <sup>y</sup><br><i>Phycodnaviridae</i> 15.59 <sup>y</sup><br><i>Circoviridae</i> 10.87 <sup>y</sup><br><i>Ascoviridae</i> 7.41 <sup>x</sup><br><i>Polydnaviridae</i> 5.98 <sup>y</sup><br><i>Poxviridae</i> 5.70 <sup>x</sup> | <b>Avg. Diss. 68.39</b><br><i>Herpesviridae</i> 23.48 <sup>x</sup><br><i>Phycodnaviridae</i> 16.01 <sup>y</sup><br><i>Nanoviridae</i> 15.54 <sup>y</sup><br>Satellite 10.62 <sup>x</sup><br><i>Mimiviridae</i> 9.68 <sup>x</sup><br><i>Poxviridae</i> 7.51 <sup>x</sup><br><i>Circoviridae</i> 6.87 <sup>y</sup><br><i>Polydnaviridae</i> 4.70 <sup>y</sup> | <b>Avg. Diss. 51.22</b><br><i>Phycodnaviridae</i> 25.17 <sup>y</sup><br><i>Circoviridae</i> 19.00 <sup>x</sup><br><i>Herpesviridae</i> 15.13 <sup>x</sup><br><i>Nanoviridae</i> 11.68 <sup>y</sup><br>Satellite 10.33 <sup>x</sup><br><i>Polydnaviridae</i> 26.67 <sup>y</sup><br><i>Poxviridae</i> 2.96 <sup>y</sup>                                                                        | <b>Avg. Diss. 28.80</b><br><i>Circoviridae</i> 29.48 <sup>x</sup><br><i>Nanoviridae</i> 19.87 <sup>y</sup><br>Satellite 16.91 <sup>x</sup><br><i>Phycodnaviridae</i> 14.47 <sup>y</sup><br><i>Poxviridae</i> 8.93 <sup>y</sup><br><i>Ascoviridae</i> 1.77 <sup>x</sup> | NA (Less than 2 samples) |

Supplemental Table 3. Shannon diversity index of mean relative percentage of eukaryotic viral types of all viromes generated. Bold denotes significantly different than Healthy.

| Sample                  | Shannon Diversity (H') | Standard Error |
|-------------------------|------------------------|----------------|
| Healthy                 | 0.98                   | 0.19           |
| Bleached                | 1.35                   | 0.11           |
| Bleached+WP Diseased    | 1.30                   | 0.10           |
| WP Diseased             | <b>1.62</b>            | 0.08           |
| SW Bleached             | 1.80                   | NA             |
| SW Bleached+WP Diseased | 1.87                   | NA             |

Supplementary Figure 1. Non-metric multidimensional scaling (MDS) 3D plot comparing viral consortia from viromes. MDS plot was constructed from a Bray-Curtis similarity resemblance matrix based on relative percentage of similarities to viral family.

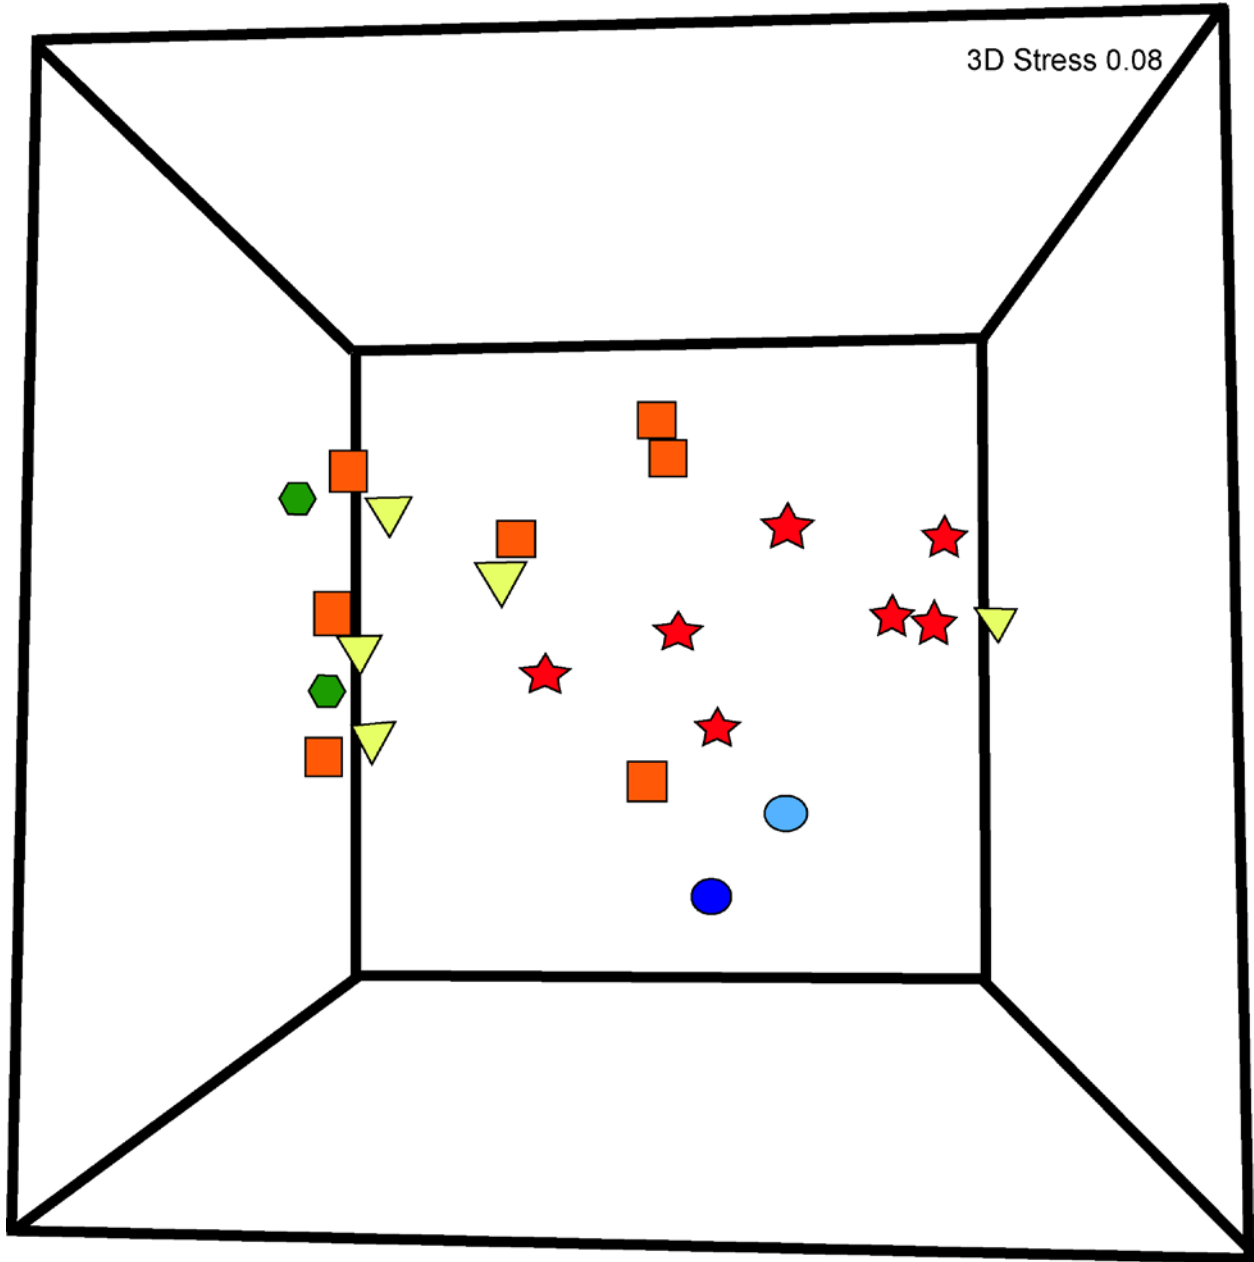

- |                                                                                                           |                                                                                                                   |
|-----------------------------------------------------------------------------------------------------------|-------------------------------------------------------------------------------------------------------------------|
|  Healthy               |  Diseased                    |
|  Bleached              |  SW Bleached                 |
|  Bleached+<br>Diseased |  SW Bleached+<br>WP Diseased |

Supplementary Figure 2. Cluster analysis of viral consortia from both diseased (intra colony) coral tissue types: Bleached+WP Diseased and WP Diseased. Cluster dendrogram was constructed using group-average linking (similarity was calculated from means of clusters and not the max. or min. values) and Bray Curtis similarities of relative percentages for only Bleached+WP Diseased (BD) and WP Diseased (D) coral colony health states. Matching icons indicate health states from the same coral colony. Black icons are BD tissues, while gray icons are D tissues.

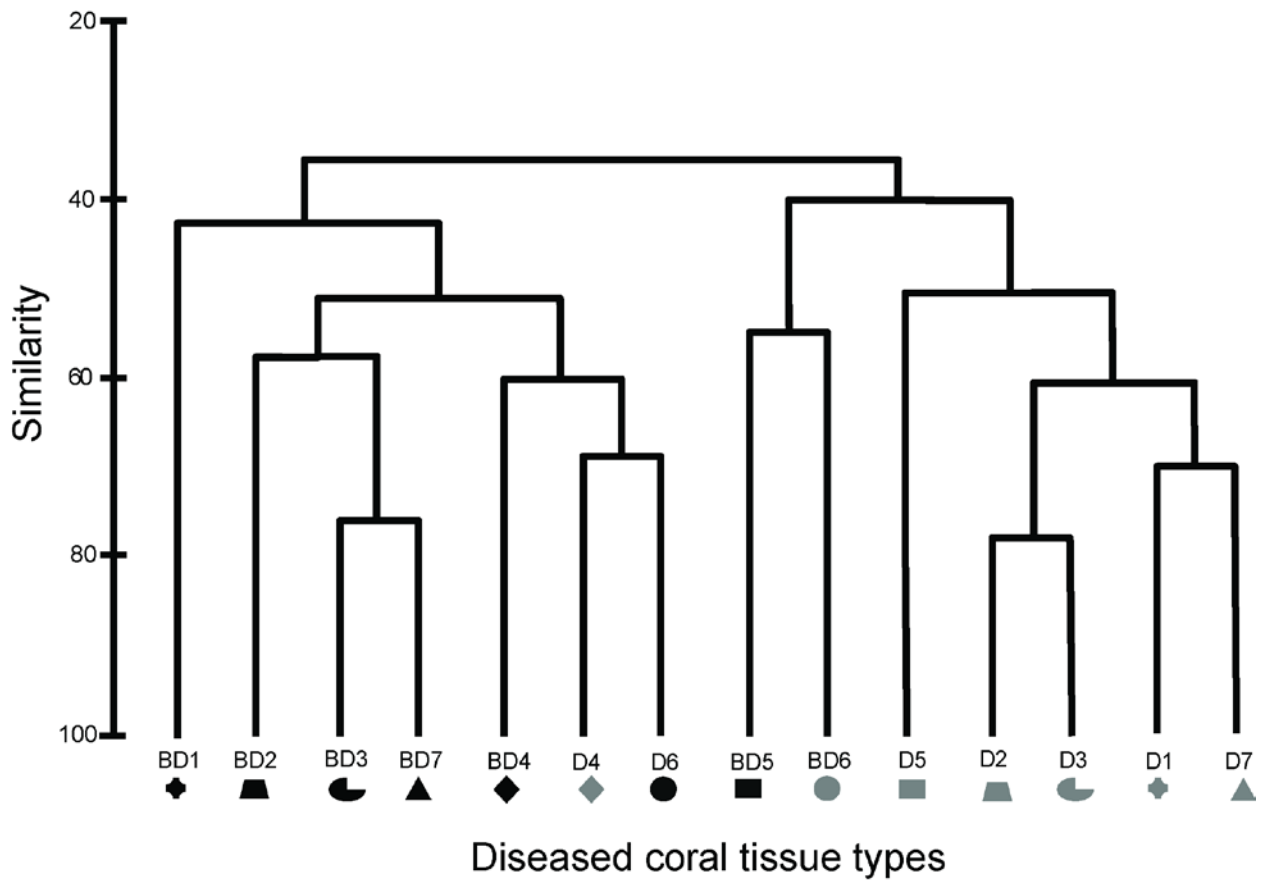

Supplementary Figure 3. Neighbor-Joining phylogenetic tree of SDSDV Rep proteins from WP Diseased health types (D, colored red) and both seawaters (SWD, SWBD, colored blue). Branch length and scores 0-1 represent branch-support based on bootstrap percentages (10,000 bootstraps). Numbers indicate from which sample (i.e. D1.2) the sequence originated. SCSDVs known to infect plants are colored green, while those known to infect animals are colored mustard. Sequence names starting with RW are from reclaimed water (Rosario et al, 2009). A novel SW clade is indicated with a triangle, while stars designate coral specific SCSDV clades.





Supplementary Figure 4. Alignments (above) and ANI distances in percentages (below) of circoviruses, nanoviruses, and satellite DNA genomes to representative SCSDV contigs (noted with red asterisks - i.e: “putative circovirus”) from WP Diseased libraries. As a control, known ANI distances of known circoviruses to each other and known nanoviruses to each other were compared, and statistical differences in ANI were found (d.f. =11,  $p < 0.01$ ). Green bars denote 100% nucleotide agreement, mustard bars denote 30-99% agreement, and red bars denote  $< 30\%$  agreement among sequences. Black squares represent  $> 25\%$  identity to the consensus, while gray squares represent  $< 25\%$  identity to the consensus alignment. Reference whole genomes were from NCBI with respective accession numbers: **circoviruses:** Beak + feather= ref[NC\_001944.1; Porcine= ref[NC\_001792.2; Raven=ref[NC\_008375.1; Duck=ref[NC\_007220.1; **nanoviruses:** Abaca bunchy= ref[NC\_010319.1]; Banana bunchy=ref[NC\_003479.1; coconut folior decay=ref[NC\_001465.1; **satellites:** Ageratum alphasatellite=ref[NC\_019547.1; Cotton alphasatellite = ref[NC\_013593.1; Tobacco necrosis satellite= ref[NC\_001557.1]

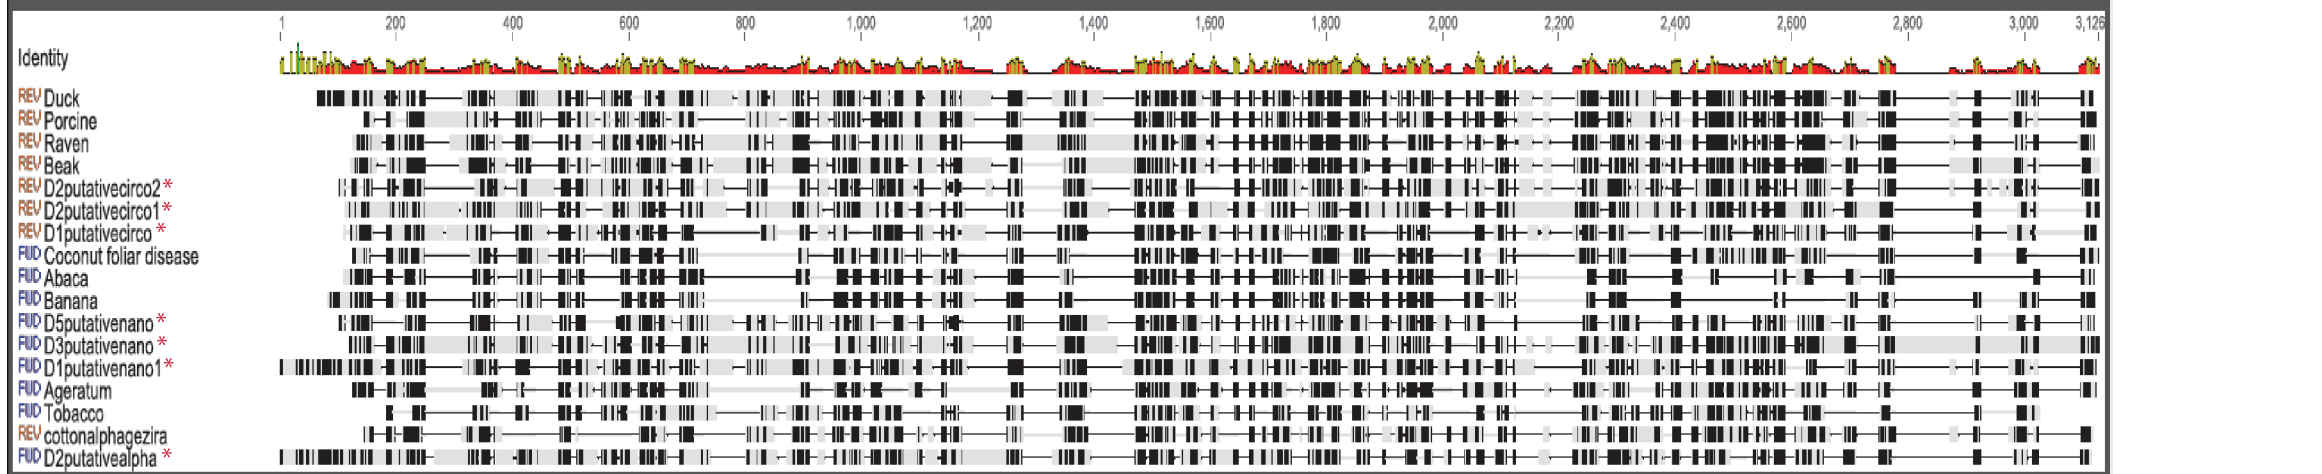

|                        | Duck | Porcine | Raven | Beak | D2 putative circo2 | D2 putative circo1 | D1 putative circo | Coconut foliar disease | Abaca | Banana | D5 Putative nano | D3 Putative nano | D1 putativenano1 | Ageratum | Tobacco | cottonalpha |
|------------------------|------|---------|-------|------|--------------------|--------------------|-------------------|------------------------|-------|--------|------------------|------------------|------------------|----------|---------|-------------|
| Duck                   |      |         |       |      |                    |                    |                   |                        |       |        |                  |                  |                  |          |         |             |
| Porcine                | 31.7 |         |       |      |                    |                    |                   |                        |       |        |                  |                  |                  |          |         |             |
| Raven                  | 34.8 | 32.3    |       |      |                    |                    |                   |                        |       |        |                  |                  |                  |          |         |             |
| Beak                   | 34.6 | 32.6    | 44.4  |      |                    |                    |                   |                        |       |        |                  |                  |                  |          |         |             |
| D2putativecirco2*      | 22.8 | 23.7    | 22.4  | 23.7 |                    |                    |                   |                        |       |        |                  |                  |                  |          |         |             |
| D2putativecirco1*      | 22.3 | 23.6    | 23.1  | 23   | 21.3               |                    |                   |                        |       |        |                  |                  |                  |          |         |             |
| D1 putativecirco*      | 21.1 | 25      | 20.8  | 20.4 | 20.8               | 19.9               |                   |                        |       |        |                  |                  |                  |          |         |             |
| Coconut foliar disease | 20.1 | 21.1    | 19.6  | 19.5 | 20.6               | 16.9               | 19.6              |                        |       |        |                  |                  |                  |          |         |             |
| Abaca                  | 19   | 20.2    | 18.6  | 18.5 | 18                 | 16.3               | 21.6              | 25.6                   |       |        |                  |                  |                  |          |         |             |
| Banana                 | 18.6 | 20      | 18.2  | 17.7 | 17.4               | 15.6               | 21.8              | 25.2                   | 66.9  |        |                  |                  |                  |          |         |             |
| D5putativenano*        | 23.6 | 21.7    | 22.2  | 22.1 | 21.6               | 18.6               | 19                | 20.8                   | 20.6  | 20.7   |                  |                  |                  |          |         |             |
| D3putativenano*        | 24.5 | 23.1    | 24.1  | 24.9 | 20                 | 21.6               | 18.7              | 18.2                   | 16.9  | 16.9   | 19.7             |                  |                  |          |         |             |
| D1 putativenano1*      | 24.9 | 24.5    | 25.5  | 24.3 | 22.3               | 23.4               | 21.5              | 19.9                   | 18.3  | 19.6   | 22.4             | 21.7             |                  |          |         |             |
| Ageratum               | 21.3 | 21.8    | 21.9  | 21.2 | 20.6               | 20                 | 21.4              | 29.4                   | 24.7  | 26.1   | 20.8             | 19.2             | 22.2             |          |         |             |
| Tobacco                | 20.3 | 21.6    | 21.4  | 21.3 | 20                 | 17.3               | 18.4              | 22.1                   | 19    | 19.5   | 19.6             | 17.2             | 21.7             | 24       |         |             |
| Cottonalpha            | 22.9 | 25.2    | 21.7  | 23.9 | 21                 | 19.5               | 19.7              | 20.1                   | 19.9  | 20.5   | 20.2             | 19.3             | 21.9             | 23       | 21.8    |             |
| D2putativealpha*       | 26.1 | 24.6    | 23    | 24.1 | 20.5               | 23.2               | 23.6              | 18                     | 19    | 18.3   | 20.9             | 21.4             | 22.9             | 22       | 19.9    | 19.3        |
